# Supplementary material for: Reliable mortality statistics for Turkey: Are we there yet?
Source: PubMed Central journal article supplement (PMC4460716; doi:10.1186/s12889-015-1904-1), 2015-06-10
Supplement: 12889_2015_1904_MOESM2_ESM.pdf [file 12889_2015_1904_MOESM2_ESM.pdf]

# Additional file 2 The revised TURKSTAT Death Certificate

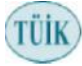

## DEATH CERTIFICATE

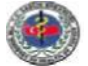

S1 Form no: 000000001

|                                                                                                                                                                                                                                                                                                                                                                                                                                                                                                                                                                                                                                                                                                    |                                                                                                                                                                                                                                                                                                                                                                                                                                                                                                                                                                                                                                                                                                                                                                                                                                                                                                                                                                                                                                                                                                                                                         |
|----------------------------------------------------------------------------------------------------------------------------------------------------------------------------------------------------------------------------------------------------------------------------------------------------------------------------------------------------------------------------------------------------------------------------------------------------------------------------------------------------------------------------------------------------------------------------------------------------------------------------------------------------------------------------------------------------|---------------------------------------------------------------------------------------------------------------------------------------------------------------------------------------------------------------------------------------------------------------------------------------------------------------------------------------------------------------------------------------------------------------------------------------------------------------------------------------------------------------------------------------------------------------------------------------------------------------------------------------------------------------------------------------------------------------------------------------------------------------------------------------------------------------------------------------------------------------------------------------------------------------------------------------------------------------------------------------------------------------------------------------------------------------------------------------------------------------------------------------------------------|
| <b>Province</b> .....□□<br><b>District</b> .....□□                                                                                                                                                                                                                                                                                                                                                                                                                                                                                                                                                                                                                                                 | <b>Town/Village</b> .....□□<br><b>Institute</b> .....□□                                                                                                                                                                                                                                                                                                                                                                                                                                                                                                                                                                                                                                                                                                                                                                                                                                                                                                                                                                                                                                                                                                 |
| <b>A</b> <b>DECEDENT'S INFORMATION</b><br>Identity (ID) Number □□□□□□□□□□<br><input type="checkbox"/> No ID<br>Nationality <input type="checkbox"/> TR<br><input type="checkbox"/> Other.....□□□□<br>Name and Surname .....<br>Father's Name .....<br>Date of Birth (Day/Month/Year) □□ □□ □□□□<br>Place of Birth .....<br>Volume number (In ID Card) □□□□ Family sequence number (In ID Card) □□□□□□<br>Person sequence number (In ID Card) □□□□□□<br>Sex <input type="checkbox"/> Male <input type="checkbox"/> Female<br>Education level (Completed) ..... □□<br>Profession ..... □□□□<br>Residence:<br>Province ..... □□<br>District ..... □□<br>Town or Village ..... □□<br>Abroad ..... □□□□ | <b>C</b> <b>MANNER OF DEATH</b><br><input type="checkbox"/> Natural <input type="checkbox"/> Traffic accident <input type="checkbox"/> Other<br><input type="checkbox"/> Homicide <input type="checkbox"/> Industrial accident <input type="checkbox"/> Pending investigation<br><input type="checkbox"/> Suicide <input type="checkbox"/> Other accidents <input type="checkbox"/> Could not be determined<br><b>D</b> Did the death occur as a result of injury?<br><input type="checkbox"/> Yes <input type="checkbox"/> No → <b>Go to section E</b><br>Did injury occur in the workplace <input type="checkbox"/> Yes <input type="checkbox"/> No<br>Date of injury (Day/Month/Year) □□ □□ □□□□<br>Place of injury<br><input type="checkbox"/> Decedent's Home <input type="checkbox"/> Sports area<br><input type="checkbox"/> Residential institution <input type="checkbox"/> Street and highway<br><input type="checkbox"/> Rural area (farm) <input type="checkbox"/> Trade and service area<br><input type="checkbox"/> Industrial and const. <input type="checkbox"/> School or other Ins.<br><input type="checkbox"/> Other (explain) ..... |
| <b>B</b><br>Date of Death (Hour/Day/Month/Year) □□ □□ □□ □□□□<br>Place of Death<br><input type="checkbox"/> Decedent's Home <input type="checkbox"/> Hospital <input type="checkbox"/> Work Place<br><input type="checkbox"/> Ambulance <input type="checkbox"/> Other vehicles <input type="checkbox"/> Other                                                                                                                                                                                                                                                                                                                                                                                     | <b>E</b> <b>Was an autopsy performed?</b><br><input type="checkbox"/> Yes <input type="checkbox"/> No → <b>Go to section F</b><br>Were autopsy findings available to complete the cause of death?<br><input type="checkbox"/> Yes <input type="checkbox"/> No → <b>Go to section F</b><br>Can more information be obtained later?<br><input type="checkbox"/> Yes <input type="checkbox"/> No                                                                                                                                                                                                                                                                                                                                                                                                                                                                                                                                                                                                                                                                                                                                                           |

**INFORMANT**  
 Name and Surname:  
 Phone :  
 Relationship to decedent:  
 Signature :

**CERTIFYING PHYSICIAN**  
 Name and Surname :  
 Title:  
 Date:  
 Signature:  
 License number:

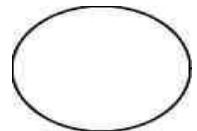

|                                                                                                                                                                                                                           |                                                                                                     |
|---------------------------------------------------------------------------------------------------------------------------------------------------------------------------------------------------------------------------|-----------------------------------------------------------------------------------------------------|
| <b>F</b> <b>Stillbirth</b> <input type="checkbox"/> Yes <input type="checkbox"/> No }<br><b>Infant mortality</b> <input type="checkbox"/> Yes <input type="checkbox"/> No } <b>Go to section G</b><br>Time of Delivery □□ | Mother's ID No: □□ □□□□□□□□<br>Mother's age □□ Number of birth □□<br>Gestation □□ Birth weight □□□□ |
|---------------------------------------------------------------------------------------------------------------------------------------------------------------------------------------------------------------------------|-----------------------------------------------------------------------------------------------------|

|                                                                                                                                                                                                                      |                                                                                                                            |
|----------------------------------------------------------------------------------------------------------------------------------------------------------------------------------------------------------------------|----------------------------------------------------------------------------------------------------------------------------|
| <b>G</b> If Female: <input type="checkbox"/> Pregnant at time of death <input type="checkbox"/> Death occurred during delivery<br><input type="checkbox"/> Not pregnant, but pregnant 43 days to 1 year before death | <input type="checkbox"/> Not pregnant, but pregnant with in 42 days of death<br><input type="checkbox"/> No maternal death |
|----------------------------------------------------------------------------------------------------------------------------------------------------------------------------------------------------------------------|----------------------------------------------------------------------------------------------------------------------------|

|                                                                                                                                                                                                                                                                                                                                                                                                                                                                                                                            |                                                                                                                                                                                              |                                                                                 |
|----------------------------------------------------------------------------------------------------------------------------------------------------------------------------------------------------------------------------------------------------------------------------------------------------------------------------------------------------------------------------------------------------------------------------------------------------------------------------------------------------------------------------|----------------------------------------------------------------------------------------------------------------------------------------------------------------------------------------------|---------------------------------------------------------------------------------|
| <b>H</b><br><b>PART I</b><br>Enter the chain of events-diseases, injuries, or complications- that directly caused the death*<br><b>Immediate cause:</b> Final disease or condition resulting in death.<br>Sequentially list conditions, if any, leading to the cause listed on line a.<br>Enter the <b>Underlying cause</b> (disease or injury that initiated the events resulting in death) last<br><b>PART II</b><br>Enter other significant conditions to death but not resulting in the underlying cause given PART I. | <b>CAUSE OF DEATH</b><br>a).....<br>Due to (or as a consequence of) .....<br>b).....<br>Due to (or as a consequence of) .....<br>c).....<br>Due to (or as a consequence of) .....<br>d)..... | <b>Approximate interval: Onset to death</b><br>.....<br>.....<br>.....<br>..... |
|----------------------------------------------------------------------------------------------------------------------------------------------------------------------------------------------------------------------------------------------------------------------------------------------------------------------------------------------------------------------------------------------------------------------------------------------------------------------------------------------------------------------------|----------------------------------------------------------------------------------------------------------------------------------------------------------------------------------------------|---------------------------------------------------------------------------------|

*\*Do not enter terminal events such as cardiac arrest or respiratory arrest without the etiology.*
